# Supplementary material for: Mechanistic insight into the lanthanide (iii) salt catalysed monoacylation of symmetrical diols from structural modelsElectronic supplementary information (ESI) available: experimental details. See http://www.rsc.org/suppdata/cc/b3/b308171k/
Source: Royal Society of Chemistry journal article supplement (doi:10.1039/b308171k), 2003-01-01
Supplement: b308171k.doc [file b308171k.doc]

**Supporting Information**

**Mechanistic insight into the lanthanide (III) salt catalysed monoacylation of symmetrical diols from structural models.**

Paul A. Clarke, Polly L. Arnold, Martin A. Smith, Louise S. Natrajan, Claire Wilson and Chuen Chan

**General**

All solvents used (toluene, THF, diethyl ether, hexane, pentane) were either degassed and purified by passage through activated alumina towers prior to use, or were freshly distilled from the appropriate drying regent under nitrogen, and thoroughly degassed prior to use. Diethyl ether from sodium/benzophenone ketyl, pentane from NaK alloy/benzophenone ketyl, toluene from sodium, hexane from potassium/benzophenone ketyl, and THF from potassium/benzophenone ketyl. NMR grade benzene-*d*6, toluene-*d*8 and spectroscopic grade methyl-THF were refluxed over potassium metal and transferred under reduced pressure.

**Acylation with a saturated solution of CeCl3 experiment**

A solution of the catalyst was prepared by adding freshly distilled THF (10.9 ml) to a flask containing CeCl3 (100 mg, 0.40 mmol). The solution was allowed to stir for 24h. The concentration of the solution was found to be 0.018 M.[[1]](#footnote-2)

The acylation reaction was carried out by adding the THF solution of CeCl3 (0.82 ml, 5 mol% CeCl3 w.r.t diol) to a flask containing *meso-*hydrobenzoin (64.0 mg, 0.30 mmol) under an atmosphere of nitrogen. Acetic anhydride (0.26 ml, 3.00 mmol) was added and the reaction was stirred for 24 h. After this time the mixture was diluted with ether (20 ml) and washed successively with saturated aqueous NaHCO3 (2 x 20 ml), brine (20 )ml, dried (MgSO4) and solvent removed*.* The composition of the resulting mixture was calculated by integration of the 1H NMR signals and was shown to be 95:5 *meso-*hydrobenzoin mono acetate to *meso-*hydrobenzoin *bis­* acetate.

**NMR studies**

All NMR run on a Bruker AV400 NMR spectrometer at 400 MHz over 16 scans.

**Acylation reaction with [Eu(tfc)3]**

Methylene chloride was added to a round bottom flask containing *meso-*hydrobenzoin (8.6 mg, 0.04 mmol) and [Eu(tfc)3] (18 mg, 0.004 mmol). Acetic anhydride (3.6 l, 0.4 mmol) was added to this stirring solution. The mixture was allowed to stir for 20 h before being diluted with ether (20 ml) and washed successively with saturated aqueous NaHCO3 (2 x 20 ml), brine (20 ml), dried (MgSO4) and the solvent removed*.* The composition of the resulting mixture was calculated by integration of the 1H NMR signals and was shown to be 10:90 *meso-*hydrobenzoin to *meso-*hydrobenzoin mono acetate.

***meso-*hydrobenzoin**

A sample was prepared containing *meso-*hydrobenzoin (10 mg, 0.05 mmol) in CDCl3 (0.8 ml). 1H NMR (CDCl3, 400 MHz)  7.36 – 7.26 (10H, m), 4.85 (2H, s)

A second sample was prepared containing *meso-*hydrobenzoin (10 mg, 0.05 mmol) in CDCl3 (0.8 ml), to this was added [Eu(tfc)3] (4.2 mg, 0.005 mmol). 1H NMR (CDCl3, 400 MHz)  7.48 (10H, m), 5.22 (2H, s).

***meso-*hydrobenzoin mono acetate**

A sample was prepared containing *meso-*hydrobenzoin mono acetate (10 mg, 0.04 mmol) in CD2Cl2 (0.8 ml). 1H NMR (CD2Cl2, 400 MHz)  7.31 – 7.21 (10 H, m), 5.81 (1H, d, *J* =6.1 Hz), 4.96 (1H, m), 1.96 (3H, s)

A second sample was prepared containing *meso-*hydrobenzoin mono acetate (10 mg, 0.04 mmol) in CD2Cl2 (0.8 ml), to this was added [Eu(tfc)3] (18 mg, 0.02 mmol). 1H NMR (CD2Cl2, 400 MHz)  7.44 – 7.33 (10H, m), 6.58 (0.5H, bs,), 6.50 (0.5H, bs), 5.42 (1H, m), 3.80 (0.5H bs), 3.60 (0.5H, bs) 2.27 (1.5H, s), 2.23 (1.5H, s).

**Acylation using praseodymium complexes**

A solution of *meso*-hydrobenzoin (214 mg, 1.00 mmol) in THF (2.70 ml) was added to a flask equipped with a stirrer bar containing PrCl3 (24.7 mg, 0.10 mmol) under an atmosphere of nitrogen. To this solution was added pivalic anhydride (1.01 ml, 5.00 mmol) and the mixture was stirred for 24 h. After this time the mixture was diluted with ether (20 ml) and washed successively with saturated aqueous NaHCO3 (2 x 20 ml), brine (20 ml0, dried (MgSO4) and the solvent removed*.* The composition of the resulting mixture was calculated by integration of the 1H NMR signals and was shown to be 33:66 *meso-*hydrobenzoin to *meso-*hydrobenzoin monopivalate.

A solution of *meso*-hydrobenzoin (107 mg, 0.50 mmol) in THF (1.30 ml) added to a flask equipped with a stirrer bar containing Pr(thd)3.diol **(3)** (50.0 mg, 0.05 mmol) under an atmosphere of nitrogen. Acetic anhydride (0.22 ml, 2.50 mmol) was added to this solution and the mixture was allowed to stir for 24 h. After this time the mixture was diluted with ether (20 ml) and washed successively with saturated aqueous NaHCO3 (2 x 20 ml), brine (20 ml), dried (MgSO4) and the solvent removed*.* The composition of the resulting mixture was calculated by integration of the 1H NMR signals and was shown to be 48:52 *meso-*hydrobenzoin to *meso-*hydrobenzoin monoacetate.

A solution of *meso*-hydrobenzoin (214 mg, 1.00 mmol) in THF (2.70 ml) added to a flask equipped with a stirrer bar containing Pr(thd)3 (69 mg, 0.10 mmol) under an atmosphere of nitrogen. Acetic anhydride (0.22 ml, 2.50 mmol) was added to this solution and the mixture was allowed to stir for 24 h. After this time the mixture was diluted with ether (20 ml) and washed successively with saturated aqueous NaHCO3 (2 x 20 ml), brine (20 ml), dried (MgSO4) and the solvent removed*.* The composition of the resulting mixture was calculated by integration of the 1H NMR signals and was shown to be 42:58 *meso-*hydrobenzoin to *meso-*hydrobenzoin monoacetate.

**Preparation of tris-2,2,6,6-tetramethyl-3,5-heptanedioate praesodymium *meso-*hydrobenzoin complex 3**

All experimental procedures were performed under an atmosphere of dry, oxygen free argon or nitrogen, using standard Schlenk techniques (mechanical pump for vacuum 10-4mbar). Subsequent manipulations of isolated compounds were carried out in a glove box (Mbraun Unilab or Saffron) under a dry nitrogen atmosphere.

To a stirred solution of Pr(thd)3 in THF (500mg, 0.72mmol, 30ml) cooled to -60˚C was added a solution of *meso-*hydrobenzoin in THF (150mg, 0.72mmol, 15ml) drop wise over a period of 40 minutes. The resultant solution was allowed to warm slowly to room temperature over 15 hours, after which all volatiles were removed under reduced pressure. The resultant green solid was subsequently extracted into 10ml *n*-hexane, and cooled slowly to -30°C. The precipitated solids were isolated, and washed with 3 x 3ml cold (-60°C) *n*-hexane to yield analytically pure **3** in 24 % yield, 0.1226g. Single X-Ray quality crystals were grown by slow evaporation of a saturated diethylether solution of **3**. 1H NMR (C6D6, 300 MHz) 22.33 (br, 1H,O*H*/C*H*), 5.73 (s, 10H, Ar), 3.85 (s, 54H, Bu*t*), -1.16, 3H, C*H* (thd)), -7.45 (br, 2H,C*H*/O*H*), -23.51 (br, 1H, C*H*/O*H*); IR (cm-1): 3374 (b, OH), 3312 (b, OH), 2853 (s), 1575 (s, CO), 1505 (s, CO), 1130 (m), 869 (m), 699 (m), 602 (w), 473 (w, CO-Pr); Anal. Calcd. for C47H71O8Pr: C, 62.25; H, 8.06. Found: C, 62.34; H, 8.17. 13C NMR only shows 4 weak peaks at 123.15, 155.92, 30.41, and 20.06 ppm

**Reaction of Pr(thd)3 with *rac*-propanoate ester**

A flame dried Schlenk was charged with Pr(thd)3 (100mg, 0.15mmol), and 15ml THF, and cooled to -60°C. To this was added a solution of *rac*-propionate ester in THF (39mg, 0.15mmol, 8ml) over a period of 30 minutes. Upon completion of addition, the reaction vessel was allowed to slowly attain room temperature over 12 hours. Subsequent removal of all volatiles *in vacuo*, extraction into 5ml diethylether, and cooling to -30°C, afforded single crystals of both starting materials in quantitative yield. 1H NMR (C6D6, 300 MHz) 23.01 (br, 1H,O*H*/C*H*), 6.99, (br, 4H, Ar), 6.88 (s, 2H, Ar), 6.59 (br, 2H, Ar), 5.49, (br, 2H, Ar), 4.05 (br, 54H, Bu*t*), 2.02 (br, 1H,C*H*/O*H*), -0.13 (br, 3H, C*H* (thd), -5.42 (br, 3H, C*H*3), -11.34 (br, 2H, C*H*2)

**Crystallographic data for 3.**

Table 1. Crystal data and structure refinement for prmhbz.

Identification code prmhbz

Empirical formula C102 H162 O18 Pr2

Formula weight 1958.14

Temperature 150(2) K

Wavelength 0.71073 Å

Crystal system Triclinic

Space group P-1

Unit cell dimensions a = 10.576(3) Å = 79.191(7)°.

b = 12.662(4) Å = 81.482(6)°.

c = 20.988(6) Å  = 81.016(5)°.

Volume 2706.3(14) Å3

Z 1

Density (calculated) 1.201 Mg/m3

Absorption coefficient 0.948 mm-1

F(000) 1036

Crystal size 0.71 x 0.26 x 0.20 mm3

Theta range for data collection 1.78 to 28.68°.

Index ranges -13<=h<=14, -16<=k<=16, 0<=l<=28

Reflections collected 12439

Independent reflections 12439 [R(int) = 0.0000]

Completeness to theta = 27.50° 97.4 %

Absorption correction Semi-empirical from equivalents

Max. and min. transmission 0.482 and 0.361

Refinement method Full-matrix least-squares on F2

Data / restraints / parameters 12439 / 2 / 556

Goodness-of-fit on F2 1.019

Final R indices [I>2sigma(I)] R1 = 0.0340, wR2 = 0.0800

R indices (all data) R1 = 0.0433, wR2 = 0.0828

Largest diff. peak and hole 1.083 and -0.546 e.Å-3

Table 2. Atomic coordinates ( x 104) and equivalent isotropic displacement parameters (Å2x 103)

for prmhbz. U(eq) is defined as one third of the trace of the orthogonalized Uij tensor.

________________________________________________________________________________

x y z U(eq)

________________________________________________________________________________

Pr 2179(1) 7440(1) 2420(1) 29(1)

O(31) 3658(2) 7701(1) 1433(1) 36(1)

C(31) 4410(2) 7091(2) 1090(1) 32(1)

C(32) 4839(2) 5997(2) 1309(1) 34(1)

O(33) 3795(2) 5867(1) 2391(1) 35(1)

C(33) 4542(2) 5448(2) 1945(1) 30(1)

O(41) 603(2) 8376(2) 3162(1) 54(1)

C(41) -157(3) 9251(2) 3164(1) 44(1)

C(42) -228(2) 10079(2) 2628(1) 43(1)

O(43) 1355(2) 9222(1) 1912(1) 40(1)

C(43) 526(2) 10027(2) 2022(1) 39(1)

O(51) 967(2) 6054(1) 3046(1) 38(1)

C(51) 521(2) 5255(2) 2921(1) 31(1)

C(52) 411(2) 5104(2) 2290(1) 35(1)

O(53) 1075(2) 6745(1) 1721(1) 39(1)

C(53) 671(2) 5856(2) 1725(1) 32(1)

O(61) 4125(2) 8227(1) 2668(1) 30(1)

C(61) 4466(2) 8176(2) 3314(1) 26(1)

O(62) 2715(2) 7102(1) 3642(1) 34(1)

C(62) 4051(2) 7107(2) 3702(1) 27(1)

O(70) 6353(2) 8920(2) 2047(1) 44(1)

C(71) 5099(4) 10646(2) 1825(2) 73(1)

C(72) 6426(3) 10019(3) 1778(2) 59(1)

C(73) 7564(3) 8245(3) 2000(2) 56(1)

C(74) 7367(3) 7103(3) 2283(2) 67(1)

C(310) 4878(2) 7645(2) 395(1) 39(1)

C(311) 5692(4) 6872(3) -28(1) 66(1)

C(312) 5702(5) 8485(3) 468(2) 93(2)

C(313) 3706(4) 8189(4) 73(2) 123(2)

C(330) 5156(2) 4272(2) 2154(1) 36(1)

C(331) 6117(3) 4303(2) 2637(1) 48(1)

C(332) 4087(3) 3605(2) 2505(1) 46(1)

C(410) -1033(3) 9325(2) 3817(2) 56(1)

C(411) -1829(5) 10421(3) 3850(2) 108(2)

C(412) -177(4) 9018(4) 4383(2) 94(1)

C(413) -1925(3) 8457(3) 3903(2) 70(1)

C(430) 415(3) 10964(2) 1436(2) 50(1)

C(431) 1694(3) 11404(3) 1285(2) 86(1)

C(432) 160(4) 10479(3) 854(2) 70(1)

C(433) -684(3) 11873(2) 1556(2) 70(1)

C(510) 34(2) 4460(2) 3528(1) 37(1)

C(511) -225(3) 3392(2) 3367(2) 61(1)

C(512) 1035(3) 4230(3) 4008(2) 66(1)

C(513) -1230(3) 5029(2) 3837(2) 53(1)

C(530) 475(3) 5631(2) 1051(1) 43(1)

C(531) 1664(5) 4966(5) 810(2) 150(3)

C(532) -721(5) 5049(4) 1089(2) 99(2)

C(533) 176(5) 6678(3) 600(2) 85(1)

C(610) 3894(2) 9211(2) 3583(1) 28(1)

C(611) 4461(3) 9515(2) 4062(1) 46(1)

C(612) 3991(3) 10493(2) 4292(2) 58(1)

C(613) 2949(3) 11153(2) 4042(1) 49(1)

C(614) 2380(3) 10851(2) 3572(2) 49(1)

C(615) 2850(2) 9883(2) 3336(1) 39(1)

C(620) 4370(2) 6883(2) 4397(1) 31(1)

C(621) 3510(3) 7191(2) 4919(1) 42(1)

C(622) 3900(3) 7026(3) 5534(1) 53(1)

C(623) 5139(3) 6571(3) 5639(1) 57(1)

C(624) 5988(3) 6245(3) 5126(2) 63(1)

C(625) 5603(3) 6402(2) 4510(1) 48(1)

C(730) 5888(3) 3723(2) 1592(1) 48(1)

________________________________________________________________________________

Table 3. Selected bond lengths [Å] and angles [°] for prmhbz.

_____________________________________________________

Pr-O(53) 2.3676(17)

Pr-O(43) 2.3966(18)

Pr-O(31) 2.4054(16)

Pr-O(51) 2.4066(17)

Pr-O(33) 2.4165(17)

Pr-O(41) 2.4333(17)

Pr-O(61) 2.5785(16)

Pr-O(62) 2.6507(18)

O(61)-C(61) 1.442(3)

O(62)-C(62) 1.438(3)

O(53)-Pr-O(43) 87.67(6)

O(53)-Pr-O(31) 80.77(6)

O(43)-Pr-O(31) 78.28(6)

O(53)-Pr-O(51) 70.21(6)

O(43)-Pr-O(51) 127.57(6)

O(31)-Pr-O(51) 138.56(6)

O(53)-Pr-O(33) 88.27(6)

O(43)-Pr-O(33) 148.43(6)

O(61)-Pr-O(62) 61.26(5)

C(61)-O(61)-Pr 124.53(12)

C(62)-O(62)-Pr 114.29(12)

_____________________________________________________

Symmetry transformations used to generate equivalent atoms:

Table 4. Bond lengths [Å] and angles [°] for prmhbz.

_____________________________________________________

Pr-O(53) 2.3676(17)

Pr-O(43) 2.3966(18)

Pr-O(31) 2.4054(16)

Pr-O(51) 2.4066(17)

Pr-O(33) 2.4165(17)

Pr-O(41) 2.4333(17)

Pr-O(61) 2.5785(16)

Pr-O(62) 2.6507(18)

O(31)-C(31) 1.264(3)

C(31)-C(32) 1.402(3)

C(31)-C(310) 1.541(3)

C(32)-C(33) 1.399(3)

O(33)-C(33) 1.273(3)

C(33)-C(330) 1.539(3)

O(41)-C(41) 1.263(3)

C(41)-C(42) 1.389(4)

C(41)-C(410) 1.547(4)

C(42)-C(43) 1.405(3)

O(43)-C(43) 1.270(3)

C(43)-C(430) 1.544(4)

O(51)-C(51) 1.264(3)

C(51)-C(52) 1.398(3)

C(51)-C(510) 1.546(3)

C(52)-C(53) 1.396(3)

O(53)-C(53) 1.262(3)

C(53)-C(530) 1.545(3)

O(61)-C(61) 1.442(3)

C(61)-C(610) 1.526(3)

C(61)-C(62) 1.534(3)

O(62)-C(62) 1.438(3)

C(62)-C(620) 1.510(3)

O(70)-C(72) 1.410(3)

O(70)-C(73) 1.425(3)

C(71)-C(72) 1.500(5)

C(73)-C(74) 1.490(5)

C(310)-C(313) 1.508(4)

C(310)-C(312) 1.518(5)

C(310)-C(311) 1.524(4)

C(330)-C(730) 1.529(3)

C(330)-C(332) 1.534(4)

C(330)-C(331) 1.548(4)

C(410)-C(411) 1.515(4)

C(410)-C(413) 1.525(4)

C(410)-C(412) 1.554(5)

C(430)-C(431) 1.510(4)

C(430)-C(433) 1.531(4)

C(430)-C(432) 1.540(5)

C(510)-C(512) 1.526(4)

C(510)-C(511) 1.528(4)

C(510)-C(513) 1.530(4)

C(530)-C(531) 1.479(5)

C(530)-C(533) 1.496(4)

C(530)-C(532) 1.545(5)

C(610)-C(611) 1.384(3)

C(610)-C(615) 1.386(3)

C(611)-C(612) 1.405(4)

C(612)-C(613) 1.381(4)

C(613)-C(614) 1.369(4)

C(614)-C(615) 1.398(4)

C(620)-C(625) 1.385(3)

C(620)-C(621) 1.390(3)

C(621)-C(622) 1.383(4)

C(622)-C(623) 1.378(4)

C(623)-C(624) 1.378(4)

C(624)-C(625) 1.383(4)

O(53)-Pr-O(43) 87.67(6)

O(53)-Pr-O(31) 80.77(6)

O(43)-Pr-O(31) 78.28(6)

O(53)-Pr-O(51) 70.21(6)

O(43)-Pr-O(51) 127.57(6)

O(31)-Pr-O(51) 138.56(6)

O(53)-Pr-O(33) 88.27(6)

O(43)-Pr-O(33) 148.43(6)

O(31)-Pr-O(33) 70.17(5)

O(51)-Pr-O(33) 79.79(6)

O(53)-Pr-O(41) 108.85(7)

O(43)-Pr-O(41) 67.80(6)

O(31)-Pr-O(41) 143.93(6)

O(51)-Pr-O(41) 75.32(6)

O(33)-Pr-O(41) 142.33(6)

O(53)-Pr-O(61) 152.31(6)

O(43)-Pr-O(61) 88.91(6)

O(31)-Pr-O(61) 71.63(6)

O(51)-Pr-O(61) 131.24(6)

O(33)-Pr-O(61) 80.45(6)

O(41)-Pr-O(61) 95.16(7)

O(53)-Pr-O(62) 141.61(6)

O(43)-Pr-O(62) 120.08(6)

O(31)-Pr-O(62) 127.66(6)

O(51)-Pr-O(62) 71.71(5)

O(33)-Pr-O(62) 80.41(5)

O(41)-Pr-O(62) 65.21(7)

O(61)-Pr-O(62) 61.26(5)

C(31)-O(31)-Pr 135.79(15)

O(31)-C(31)-C(32) 124.3(2)

O(31)-C(31)-C(310) 115.0(2)

C(32)-C(31)-C(310) 120.7(2)

C(33)-C(32)-C(31) 124.6(2)

C(33)-O(33)-Pr 135.36(14)

O(33)-C(33)-C(32) 124.1(2)

O(33)-C(33)-C(330) 115.2(2)

C(32)-C(33)-C(330) 120.6(2)

C(41)-O(41)-Pr 140.12(18)

O(41)-C(41)-C(42) 123.8(2)

O(41)-C(41)-C(410) 114.2(3)

C(42)-C(41)-C(410) 122.0(2)

C(41)-C(42)-C(43) 123.5(2)

C(43)-O(43)-Pr 141.30(17)

O(43)-C(43)-C(42) 123.3(3)

O(43)-C(43)-C(430) 114.7(2)

C(42)-C(43)-C(430) 122.0(2)

C(51)-O(51)-Pr 135.33(15)

O(51)-C(51)-C(52) 123.9(2)

O(51)-C(51)-C(510) 114.9(2)

C(52)-C(51)-C(510) 121.2(2)

C(53)-C(52)-C(51) 124.4(2)

C(53)-O(53)-Pr 135.68(15)

O(53)-C(53)-C(52) 124.0(2)

O(53)-C(53)-C(530) 115.4(2)

C(52)-C(53)-C(530) 120.5(2)

C(61)-O(61)-Pr 124.53(12)

O(61)-C(61)-C(610) 110.70(18)

O(61)-C(61)-C(62) 104.74(17)

C(610)-C(61)-C(62) 117.00(17)

C(62)-O(62)-Pr 114.29(12)

O(62)-C(62)-C(620) 114.58(18)

O(62)-C(62)-C(61) 108.36(17)

C(620)-C(62)-C(61) 112.97(18)

C(72)-O(70)-C(73) 113.8(2)

O(70)-C(72)-C(71) 109.5(2)

O(70)-C(73)-C(74) 109.1(2)

C(313)-C(310)-C(312) 110.3(3)

C(313)-C(310)-C(311) 109.7(3)

C(312)-C(310)-C(311) 108.0(3)

C(313)-C(310)-C(31) 107.9(2)

C(312)-C(310)-C(31) 107.0(2)

C(311)-C(310)-C(31) 113.9(2)

C(730)-C(330)-C(332) 109.0(2)

C(730)-C(330)-C(33) 114.6(2)

C(332)-C(330)-C(33) 108.4(2)

C(730)-C(330)-C(331) 108.3(2)

C(332)-C(330)-C(331) 109.4(2)

C(33)-C(330)-C(331) 107.0(2)

C(411)-C(410)-C(413) 109.7(3)

C(411)-C(410)-C(41) 114.4(3)

C(413)-C(410)-C(41) 106.4(2)

C(411)-C(410)-C(412) 110.1(3)

C(413)-C(410)-C(412) 107.4(3)

C(41)-C(410)-C(412) 108.5(3)

C(431)-C(430)-C(433) 110.4(3)

C(431)-C(430)-C(432) 110.0(3)

C(433)-C(430)-C(432) 108.0(3)

C(431)-C(430)-C(43) 107.3(3)

C(433)-C(430)-C(43) 113.8(2)

C(432)-C(430)-C(43) 107.3(2)

C(512)-C(510)-C(511) 109.5(2)

C(512)-C(510)-C(513) 109.8(3)

C(511)-C(510)-C(513) 108.6(2)

C(512)-C(510)-C(51) 108.5(2)

C(511)-C(510)-C(51) 113.4(2)

C(513)-C(510)-C(51) 106.9(2)

C(531)-C(530)-C(533) 112.9(4)

C(531)-C(530)-C(53) 107.0(2)

C(533)-C(530)-C(53) 110.1(2)

C(531)-C(530)-C(532) 111.1(4)

C(533)-C(530)-C(532) 103.9(3)

C(53)-C(530)-C(532) 112.0(2)

C(611)-C(610)-C(615) 118.9(2)

C(611)-C(610)-C(61) 119.6(2)

C(615)-C(610)-C(61) 121.4(2)

C(610)-C(611)-C(612) 120.5(3)

C(613)-C(612)-C(611) 119.9(3)

C(614)-C(613)-C(612) 119.7(2)

C(613)-C(614)-C(615) 120.7(3)

C(610)-C(615)-C(614) 120.3(2)

C(625)-C(620)-C(621) 118.8(2)

C(625)-C(620)-C(62) 118.0(2)

C(621)-C(620)-C(62) 123.1(2)

C(622)-C(621)-C(620) 119.8(3)

C(623)-C(622)-C(621) 121.0(3)

C(622)-C(623)-C(624) 119.4(3)

C(623)-C(624)-C(625) 119.9(3)

C(624)-C(625)-C(620) 121.0(3)

_____________________________________________________________

Symmetry transformations used to generate equivalent atoms:

Table 5. Anisotropic displacement parameters (Å2x 103) for prmhbz. The anisotropic

displacement factor exponent takes the form: -22[ h2 a*2U11 + ... + 2 h k a* b* U12 ]

______________________________________________________________________________

U11 U22 U33 U23 U13 U12

______________________________________________________________________________

Pr 29(1) 36(1) 22(1) -10(1) 2(1) -8(1)

O(31) 41(1) 34(1) 27(1) -3(1) 7(1) 1(1)

C(31) 32(1) 38(1) 24(1) -4(1) 0(1) -4(1)

C(32) 36(1) 36(1) 26(1) -5(1) 2(1) 1(1)

O(33) 42(1) 38(1) 23(1) -2(1) 3(1) -4(1)

C(33) 31(1) 32(1) 29(1) -5(1) -5(1) -3(1)

O(41) 65(1) 38(1) 50(1) -13(1) 29(1) -10(1)

C(41) 38(1) 40(2) 58(2) -26(1) 19(1) -16(1)

C(42) 33(1) 39(2) 58(2) -21(1) 8(1) -7(1)

O(43) 40(1) 41(1) 36(1) -9(1) 3(1) 3(1)

C(43) 29(1) 39(1) 50(2) -15(1) -1(1) -8(1)

O(51) 48(1) 40(1) 27(1) -4(1) 2(1) -16(1)

C(51) 24(1) 28(1) 39(1) -2(1) -3(1) 1(1)

C(52) 35(1) 27(1) 44(1) -7(1) -8(1) -4(1)

O(53) 56(1) 36(1) 28(1) -4(1) -11(1) -14(1)

C(53) 32(1) 31(1) 34(1) -9(1) -10(1) -1(1)

O(61) 29(1) 39(1) 21(1) -4(1) 2(1) -12(1)

C(61) 22(1) 33(1) 25(1) -7(1) 0(1) -5(1)

O(62) 32(1) 44(1) 29(1) -9(1) -1(1) -13(1)

C(62) 25(1) 28(1) 29(1) -6(1) -1(1) -3(1)

O(70) 37(1) 47(1) 45(1) -5(1) 8(1) -16(1)

C(71) 105(3) 35(2) 67(2) 2(2) 21(2) -18(2)

C(72) 69(2) 62(2) 51(2) 5(2) -1(2) -41(2)

C(73) 34(1) 87(2) 47(2) -13(2) 4(1) -9(2)

C(74) 47(2) 74(2) 69(2) -17(2) 2(2) 18(2)

C(310) 43(1) 44(2) 24(1) 0(1) 6(1) -2(1)

C(311) 98(3) 60(2) 31(2) -8(1) 21(2) -9(2)

C(312) 154(4) 85(3) 47(2) -12(2) 31(2) -72(3)

C(313) 70(2) 206(5) 39(2) 52(3) 9(2) 44(3)

C(330) 38(1) 35(1) 33(1) -1(1) -7(1) -2(1)

C(331) 46(2) 50(2) 47(2) 4(1) -18(1) -5(1)

C(332) 46(2) 36(2) 53(2) 1(1) -3(1) -7(1)

C(410) 53(2) 52(2) 61(2) -29(2) 29(2) -18(1)

C(411) 127(4) 61(2) 114(3) -38(2) 77(3) -7(2)

C(412) 77(3) 154(4) 58(2) -48(3) 28(2) -34(3)

C(413) 61(2) 73(2) 78(2) -30(2) 34(2) -33(2)

C(430) 40(2) 40(2) 64(2) -4(1) 1(1) -3(1)

C(431) 49(2) 78(3) 117(3) 24(2) 1(2) -25(2)

C(432) 84(3) 61(2) 55(2) 4(2) -11(2) 4(2)

C(433) 58(2) 40(2) 100(3) 2(2) 6(2) 2(2)

C(510) 29(1) 33(1) 42(1) 6(1) -3(1) -4(1)

C(511) 72(2) 34(2) 68(2) 5(1) 3(2) -11(2)

C(512) 52(2) 80(2) 58(2) 30(2) -19(2) -21(2)

C(513) 47(2) 46(2) 54(2) 5(1) 12(1) -2(1)

C(530) 53(2) 44(2) 38(1) -18(1) -12(1) -4(1)

C(531) 107(4) 254(7) 104(4) -134(4) -50(3) 88(4)

C(532) 146(4) 115(4) 63(2) -19(2) -33(3) -73(3)

C(533) 147(4) 79(3) 41(2) -7(2) -41(2) -23(3)

C(610) 27(1) 27(1) 27(1) -4(1) 4(1) -6(1)

C(611) 57(2) 39(2) 43(2) -14(1) -19(1) 6(1)

C(612) 88(2) 45(2) 48(2) -22(1) -18(2) -1(2)

C(613) 63(2) 30(1) 50(2) -11(1) 8(1) 1(1)

C(614) 40(2) 32(1) 72(2) -8(1) -4(1) 3(1)

C(615) 35(1) 33(1) 51(2) -9(1) -9(1) -4(1)

C(620) 34(1) 29(1) 28(1) 0(1) -2(1) -7(1)

C(621) 40(1) 53(2) 32(1) -6(1) -2(1) -3(1)

C(622) 61(2) 68(2) 28(1) -7(1) 1(1) -17(2)

C(623) 62(2) 76(2) 32(1) 6(1) -15(1) -21(2)

C(624) 46(2) 94(3) 46(2) 3(2) -17(1) -1(2)

C(625) 39(1) 63(2) 37(1) -2(1) -6(1) 4(1)

C(730) 54(2) 38(2) 48(2) -9(1) -2(1) 6(1)

______________________________________________________________________________

Table 6. Hydrogen coordinates ( x 104) and isotropic displacement parameters (Å2x 10 3)

for prmhbz.

________________________________________________________________________________

x y z U(eq)

________________________________________________________________________________

H(32A) 5369 5599 1004 41

H(42A) -819 10716 2674 51

H(52A) 142 4445 2242 42

H(61) 4707(19) 8470(20) 2403(11) 44

H(61A) 5427 8116 3282 32

H(62) 2280(20) 7551(19) 3844(13) 51

H(62A) 4554 6512 3481 33

H(71A) 5149 11409 1635 109

H(71B) 4730 10592 2285 109

H(71C) 4550 10347 1585 109

H(72A) 6809 10083 1315 71

H(72B) 6984 10320 2019 71

H(73D) 8168 8492 2241 67

H(73E) 7941 8291 1537 67

H(74A) 8196 6635 2250 100

H(74B) 6770 6863 2041 100

H(74C) 7005 7061 2743 100

H(31A) 6458 6526 181 99

H(31B) 5960 7278 -459 99

H(31C) 5183 6314 -76 99

H(31D) 6468 8119 670 140

H(31E) 5201 8984 745 140

H(31F) 5969 8892 37 140

H(31G) 3185 7638 27 184

H(31H) 3980 8588 -360 184

H(31I) 3191 8694 342 184

H(33D) 6801 4728 2412 72

H(33E) 6498 3562 2798 72

H(33F) 5661 4638 3005 72

H(33A) 3480 3583 2199 69

H(33B) 3629 3940 2873 69

H(33C) 4469 2865 2667 69

H(41G) -2358 10611 3488 161

H(41H) -1254 10971 3815 161

H(41I) -2391 10391 4266 161

H(41D) -720 9060 4801 141

H(41E) 463 9522 4319 141

H(41F) 266 8277 4385 141

H(41A) -2488 8634 3556 106

H(41B) -2452 8431 4330 106

H(41C) -1407 7750 3878 106

H(43G) 1845 11716 1656 129

H(43H) 1678 11966 895 129

H(43I) 2386 10815 1206 129

H(43D) 79 11054 473 104

H(43E) -640 10150 968 104

H(43F) 880 9924 752 104

H(43A) -541 12196 1924 106

H(43B) -1506 11576 1656 106

H(43C) -708 12431 1163 106

H(51G) -530 2925 3770 91

H(51H) 573 3026 3160 91

H(51I) -884 3539 3067 91

H(51D) 740 3725 4395 99

H(51E) 1150 4910 4138 99

H(51F) 1858 3909 3798 99

H(51A) -1573 4548 4225 80

H(51B) -1857 5204 3520 80

H(51C) -1069 5698 3963 80

H(53G) 2407 5352 791 224

H(53H) 1592 4833 372 224

H(53I) 1781 4272 1107 224

H(53D) -808 4916 653 149

H(53E) -1494 5505 1250 149

H(53F) -619 4356 1389 149

H(53A) 899 7100 542 128

H(53B) -607 7091 787 128

H(53C) 42 6527 175 128

H(61E) 5174 9060 4236 55

H(61B) 4389 10700 4618 70

H(61F) 2628 11815 4196 59

H(61D) 1659 11302 3403 59

H(61C) 2453 9686 3006 47

H(62C) 2656 7514 4852 51

H(62E) 3306 7229 5890 63

H(62D) 5405 6482 6060 68

H(62F) 6837 5913 5196 76

H(62B) 6193 6176 4158 58

H(73A) 5293 3694 1282 72

H(73B) 6259 2985 1766 72

H(73C) 6581 4140 1369 72

________________________________________________________________________________

Table 7. Hydrogen bonds for prmhbz [Å and °].

____________________________________________________________________________

D-H...A d(D-H) d(H...A) d(D...A) <(DHA)

____________________________________________________________________________

O(61)-H(61)...O(70) 0.823(10) 1.918(13) 2.707(2) 160(3)

O(62)-H(62)...O(41) 0.816(10) 2.43(3) 2.746(3) 104(2)

____________________________________________________________________________

Symmetry transformations used to generate equivalent atoms:

1. A number of solutions of CeCl3 in dry freshly distilled THF were prepared. It was found that the average amount of CeCl3 that could be recovered from solution after filtration and removal of solvent always gave an effective concentration of 0.018 M in THF. In CH2Cl2 the effective concentration was found to be considerably lower, 0.0018 M. [↑](#footnote-ref-2)
